# Supplementary material for: Validity and Cross-Cultural Adaptation of the Persian Version of the Oxford Elbow Score
Source: Hindawi journal article supplement (doi:10.1155/2014/381237), 2014-01-01
Supplement: f1 [file 381237.f1.pdf]

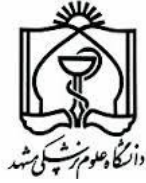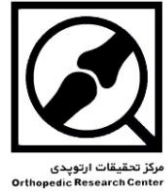

## Oxford Elbow Score

نام بیمار:

سن:

تحصیلات:

آدرس:

شماره همراه و ثابت:

شغل:

سمت درگیر:

۱. در طی ۴ هفته گذشته آیا شما مشکلی در زمینه بلند کردن اجسام در خانه داشته اید؟ (نظیر بیرون گذاشتن زباله ها)

هیچ مشکلی نداشته ام

مختصری مشکل داشته ام

در حد متوسط مشکل داشته ام

بسیار دشوار بوده است

غیر قابل انجام بوده است

برایم بسیار مشکل بوده است

غیر قابل انجام بوده است

۴. در طی ۴ هفته گذشته آیا بدلیل مشکلات آرنج، در لباس پوشیدن مشکلی داشته اید؟

خیر - مشکلی نداشته ام

مختصری برایم مشکل است

در اکثر اوقات مشکل دارم

بسیار برایم سخت است

غیر قابل انجام است

۲. در طی ۴ هفته گذشته آیا بدلیل مشکلات آرنج، حمل کردن کیسه های خرید از فروشگاه برایتان سخت بوده است؟

نه - مشکلی نداشته ام

تا حدی برایم سخت است

گهگاه برایم دشوار است

بسیار سخت است

غیر قابل انجام است

۵. در طی ۴ هفته گذشته آیا احساس کرده اید که

مشکلات آرنج زندگیتان را تحت تأثیر قرار داده است؟

خیر - به هیچ وجه

گهگاه

بعضی روزها

اکثر روزها

هر روز

۳. آیا در طی ۴ هفته گذشته بدلیل درد و مشکلات

آرنج، انجام کارهای بهداشتی و حمام کردن برایتان مشکل بوده است؟

خیر - مشکلی نداشته ام

مختصری مشکل داشته ام

در اکثر اوقات مشکل داشته ام

۶. مشکلات و درد آرنجتان تا چه حد فکر و ذهن شما را

مشغول کرده است؟

گهگاه - بسیار کم

تا حدی - بعضی اوقات

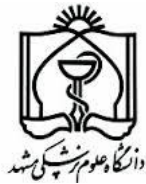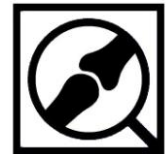

مرکز تحقیقات ارتوپدی  
Orthopedic Research Center

۱۰. آیا مشکل آرنج تان برای شرکت شما در فعالیت

های تفریحی مانع ایجاد کرده است؟

به هیچ وجه تأثیری نداشته است

مختصری مختل شده است

در حد متوسط مختل شده است

بسیار زیاد مختل شده است

تماماً مختل است

۱۱. بدترین دردی که در آرنج داشته اید را چگونه

توصیف می کنید؟

درد نداشته ام

در حد مختصر

در حد متوسط

درد شدید

غیر قابل تحمل بوده است

۱۲. دردی را که معمولاً در آرنج دارید، چگونه توصیف

می کنید؟ (درد آرنجتان در چه حدی بوده است)

درد نداشته ام

درد مختصر

درد متوسط

درد شدید

غیر قابل تحمل

اکثر اوقات

همیشه

۷. آیا در طی ۴ هفته گذشته درد شبانه آرنج داشته اید؟

نه - نداشته ام

یک یا دو شب

بعضی شب ها

اکثر شب ها

هر شب

۸. تا چه حدی درد آرنجتان مزاحم خواب شماست؟

به هیچ وجه

گهگاه

بعضی روزها

اکثر روزها

هر روز

۹. تا چه حد مشکل آرنجتان در کارهای روزمره تان

اختلال ایجاد می کند؟ (کارهای روزمره تان را مختل

کرده است)

به هیچ وجه تأثیری نداشته است

مختصری مختل شده است

در حد متوسط مختل شده است

بسیار زیاد مختل شده است

تماماً مختل است

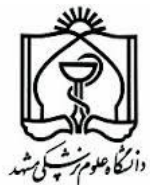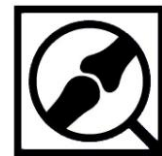

# باشکراز همکاری شما
